# Supplementary material
Source: HighWire-hosted journal article supplement (http://ajnr-stage2.highwire.org/highwire/filestream/69415/field_highwire_adjunct_files/0/19-00465.pdf)
Supplement: 19-00465.pdf [file 19-00465.pdf]

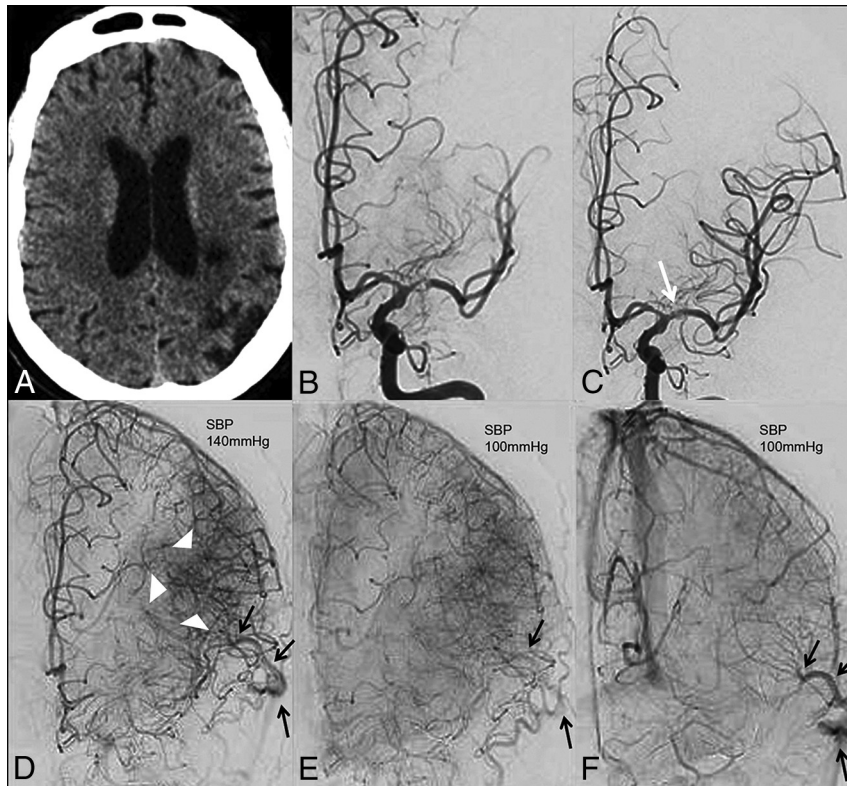

**ON-LINE FIGURE.** A 71-year-old female (patient 3) with stroke and multiple TIAs secondary to left MCA stenosis. *A*, Noncontrast CT shows chronic infarcts in the left deep watershed zone. CT angiography and CT perfusion (not shown) revealed left MCA stenosis and corresponding territorial cerebral hypoperfusion. *B* and *C*, Left ICA angiogram confirms critical short-segmental stenosis in the left proximal MCA, which was treated with balloon angioplasty (*white arrow*). *D*, Late arterial phase angiographic image obtained at baseline systolic blood pressure of 140 mm Hg shows premature contrast opacification of the vein of Labbe (*black arrows*). Abnormal capillary blush is also apparent in the revascularized parenchyma (*white arrowheads*). *E* and *F*, After stepwise reduction in systemic blood pressure, repeat angiography in the capillary and venous phase images at a systolic blood pressure of 100 mm Hg demonstrates resolution of the early draining vein, which filled in the normal venous phase (*arrows*), as well as the capillary blush. SBP indicates systolic blood pressure.

**On-line Table: Patients with early draining vein and capillary blush signs after angioplasty for intracranial atherosclerotic stenosis and the individual postintervention blood pressure thresholds**

| Case No. | Age (yr)/Sex | Vessel Treated      | Endovascular Treatment                                     | Early Draining Vein | Capillary Blush Sign | Baseline Systolic Blood Pressure | Systolic Blood Pressure without Hyperperfusion Signs | Duration of Hypotensive Therapy | CHS Symptoms |
|----------|--------------|---------------------|------------------------------------------------------------|---------------------|----------------------|----------------------------------|------------------------------------------------------|---------------------------------|--------------|
| 1        | 66/F         | Right M1            | Balloon angioplasty and Wingspan stent                     | +                   | +                    | 158 mm Hg                        | 100 mm Hg                                            | 2 Days                          | Nil          |
| 2        | 69/M         | Right terminal ICA  | Balloon angioplasty and Neuroform Atlas stent <sup>a</sup> | -                   | +                    | 130 mm Hg                        | 110 mm Hg                                            | 1 Day                           | Nil          |
| 3        | 71/F         | Left M1             | Balloon angioplasty                                        | +                   | +                    | 140 mm Hg                        | 105 mm Hg                                            | 2 Days                          | Nil          |
| 4        | 53/M         | Right cavernous ICA | Balloon angioplasty and Wingspan stent                     | +                   | +                    | 160 mm Hg                        | 120 mm Hg                                            | 1 Day                           | Nil          |

**Note:**—+ indicates present; Nil, nonexistent.

<sup>a</sup> Stryker.
